# Supplementary material for: Factor analysis of ancient population genomic samples
Source: PubMed Central journal article supplement (PMC7494920; doi:10.1038/s41467-020-18335-6), 2020-09-16
Supplement: 41467_2020_18335_MOESM3_ESM.pdf [file 41467_2020_18335_MOESM3_ESM.pdf]

## **Description of Additional Supplementary Files**

### **Supplementary Data 1**

**Description:** Sample information and metadata
